# Supplementary figures and images for: Identification, Classification and Characterization Analysis of FBXL Gene in Cotton
Source: MDPI journal article supplement (doi:10.3390/genes13122194), 2022-11-23

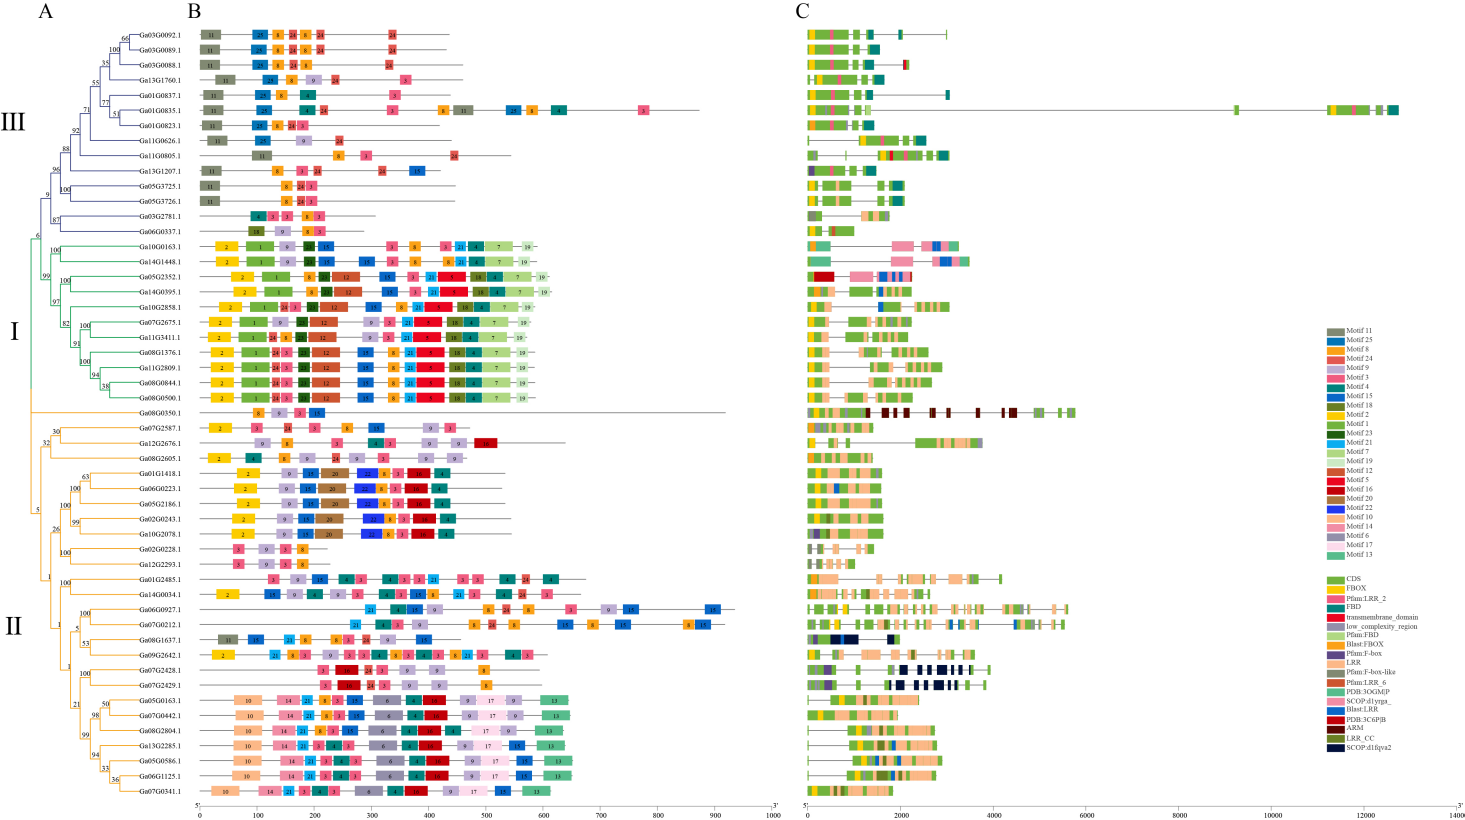

Supplement: s1 [file s1]

I

II

III

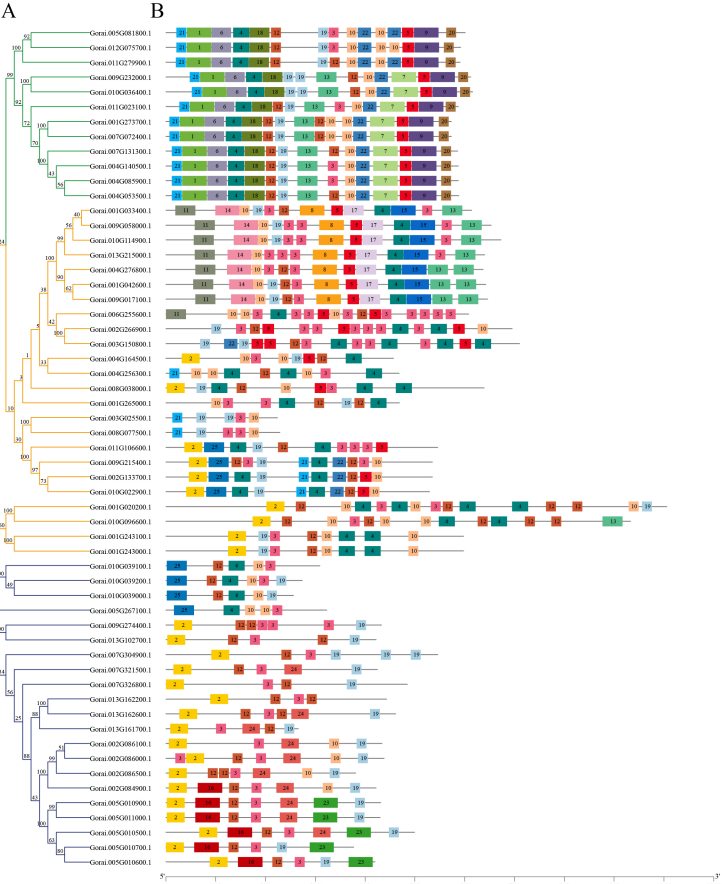

C

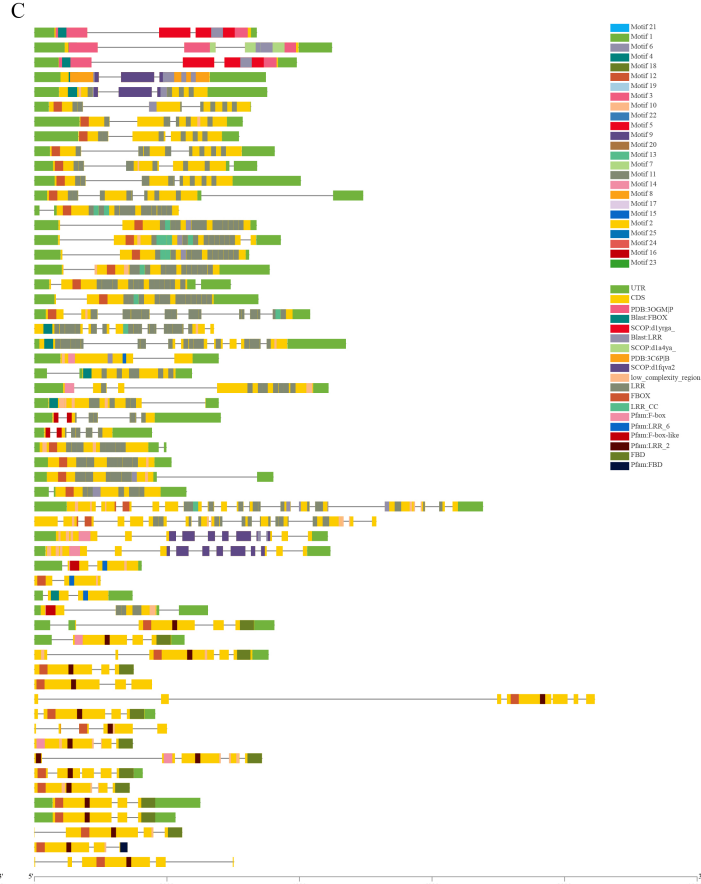

Supplement: s1 [file s1]

Ga

0 Mb  
30 Mb  
60 Mb  
90 Mb  
120 Mb  
150 Mb

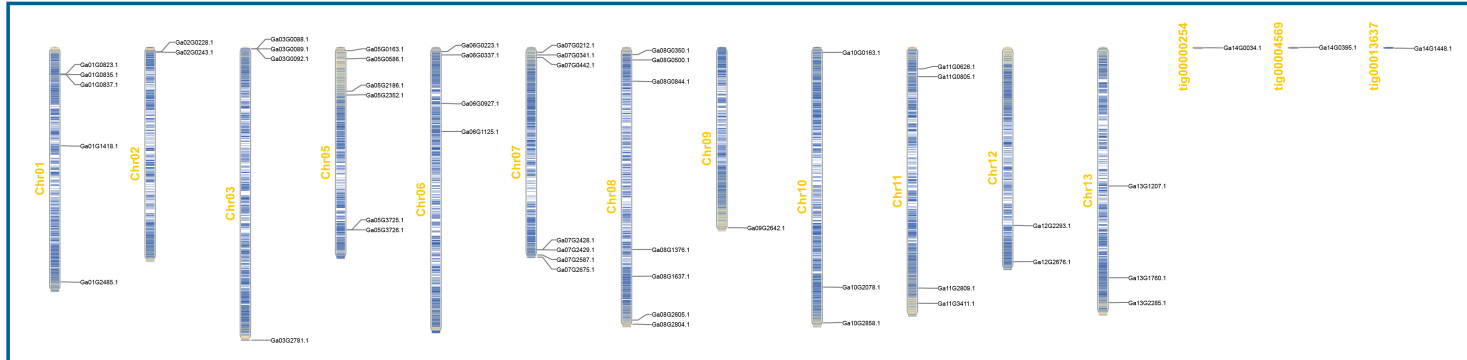

Gr

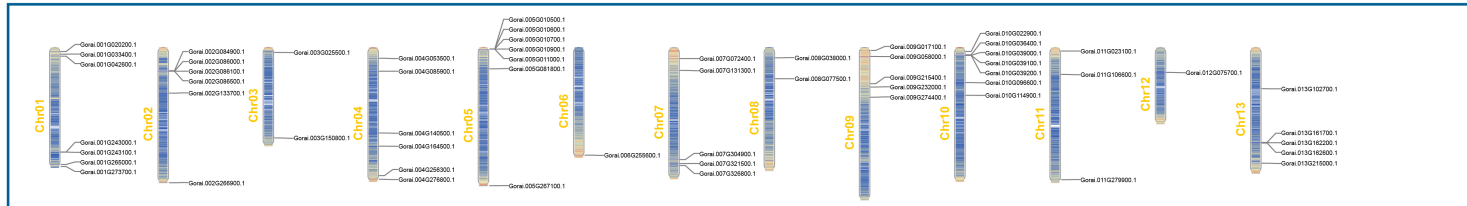

Gh

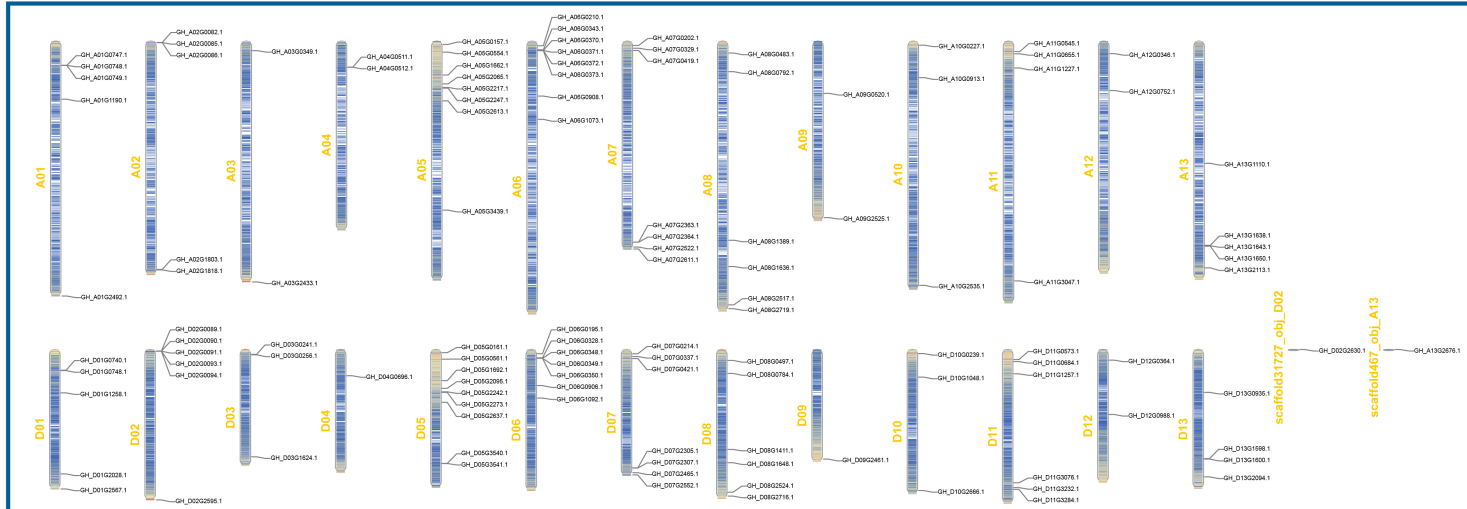

Gb

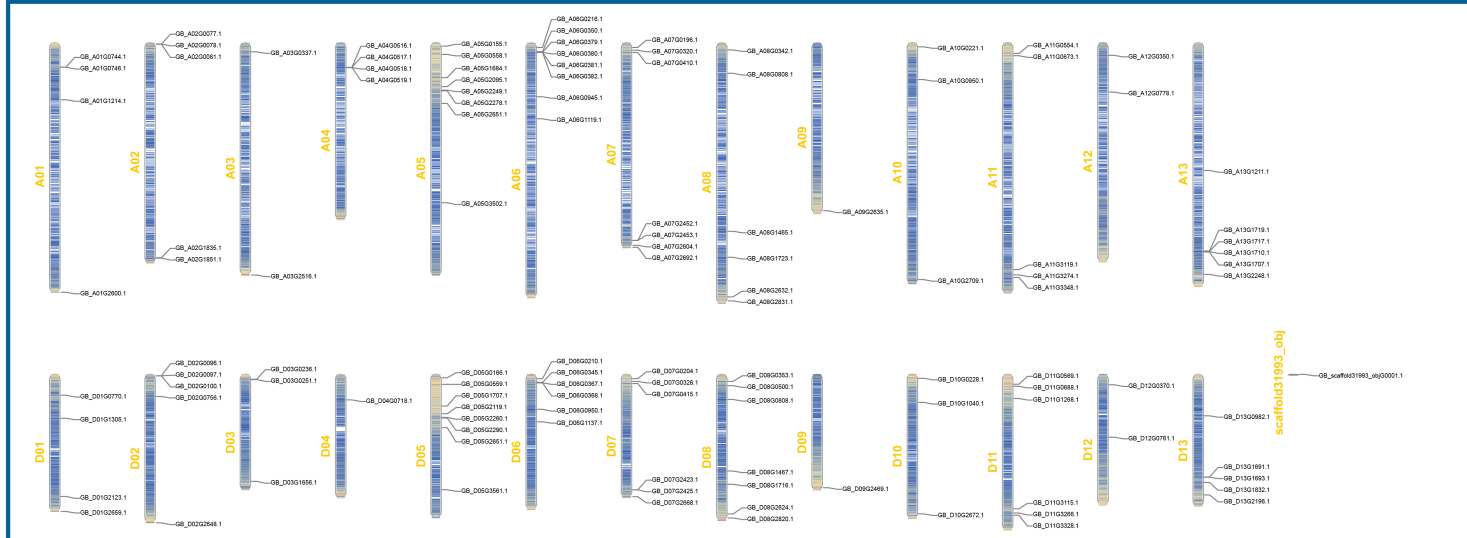

Supplement: s1 [file s1]
